# Supplementary material for: Two-step facile synthesis of Co3O4@C reinforced PbO2 coated electrode to promote efficient oxygen evolution reaction for zinc electrowinning
Source: Royal Society of Chemistry journal article supplement (doi:10.1039/d1ra09100j), 2022-01-01
Supplement: d1ra09100j1.pdf [file d1ra09100j1.pdf]

**Two-step facile synthesis of  $\text{Co}_3\text{O}_4@\text{C}$  reinforcing  $\text{PbO}_2$  coated  
electrode to promote efficiently oxygen evolution reaction for zinc  
electrowinning**

Wenhao Jiang<sup>a,b</sup>, Junli Wang<sup>c</sup>, Xuanbing Wang<sup>a,b</sup>, Jiang Liao<sup>a</sup>, Jinlong Wei<sup>b</sup>, Ruidong Xu<sup>a,b\*</sup>,  
Linjing Yang<sup>a,b\*</sup>

*a State Key Laboratory of Complex Nonferrous Metal Resources Clean Utilization, Kunming University of Science and Technology, Kunming 650093, China*

*b Faculty of Metallurgical and Energy Engineering, Kunming University of Science and Technology, Kunming 650093, China*

*c Researcher center for analysis and measurement, Kunming University of Science and Technology, Kunming 650093, China*

---

\* Corresponding author E-mail: [rdxupaper@aliyun.com](mailto:rdxupaper@aliyun.com);

\* Corresponding author E-mail: [eslinjingyang@kust.edu.cn](mailto:eslinjingyang@kust.edu.cn).

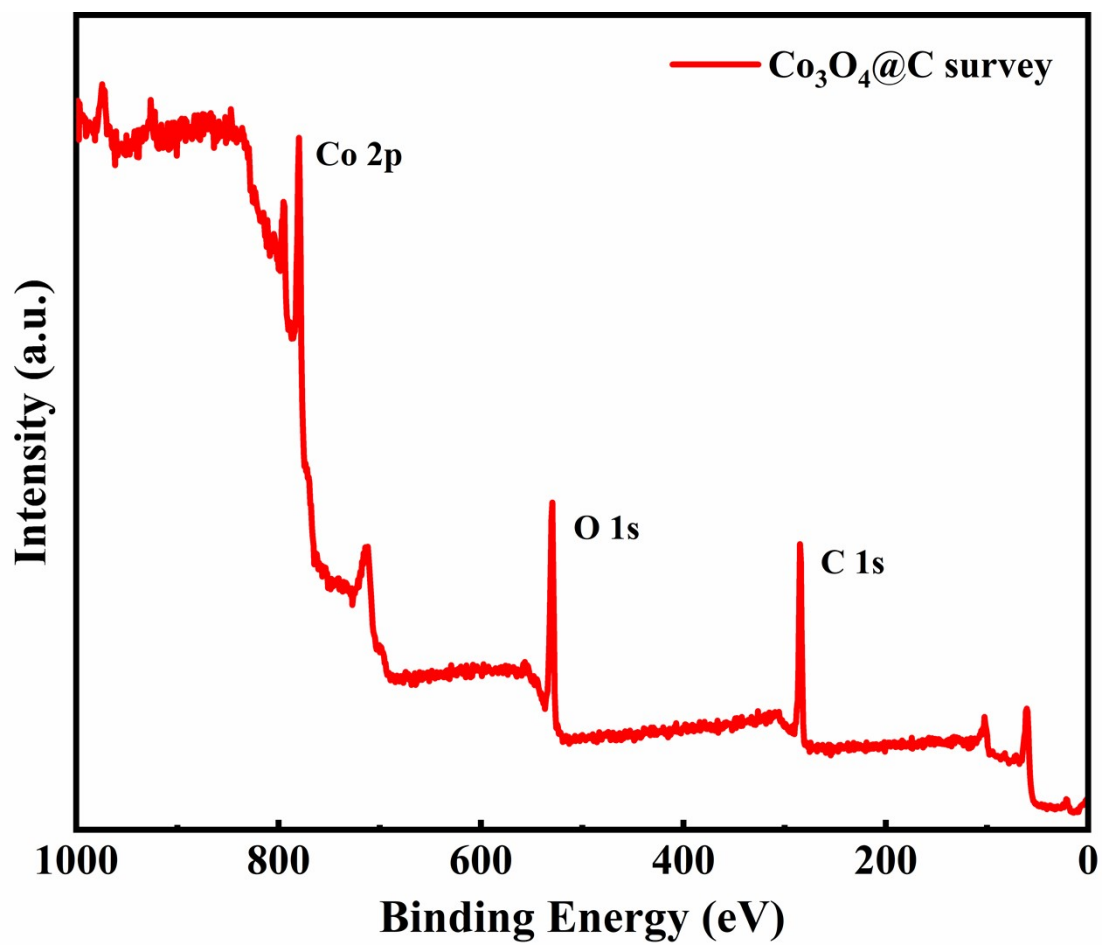

Fig. S1 The full XPS spectrum.

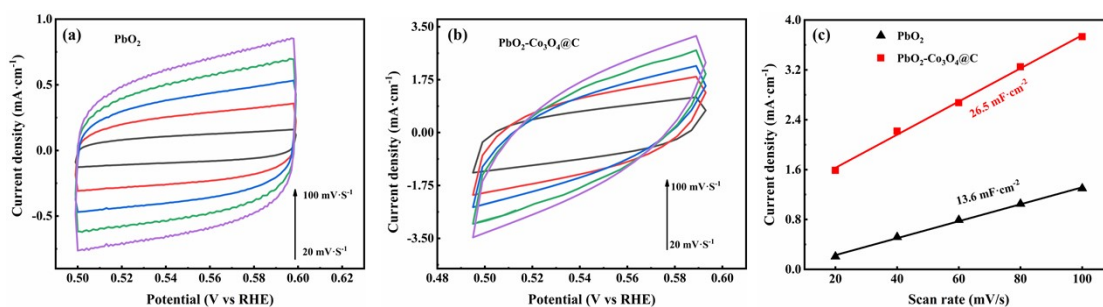

**Fig. S2** CV curves of (a)  $\text{PbO}_2$  and (b)  $\text{PbO}_2\text{-Co}_3\text{O}_4\text{@C}$  deposit at different scan rates; and (c) Double-layer capacitance measurements for determining electrochemically active surface area of  $\text{PbO}_2$  and  $\text{PbO}_2\text{-Co}_3\text{O}_4\text{@C}$  deposit.

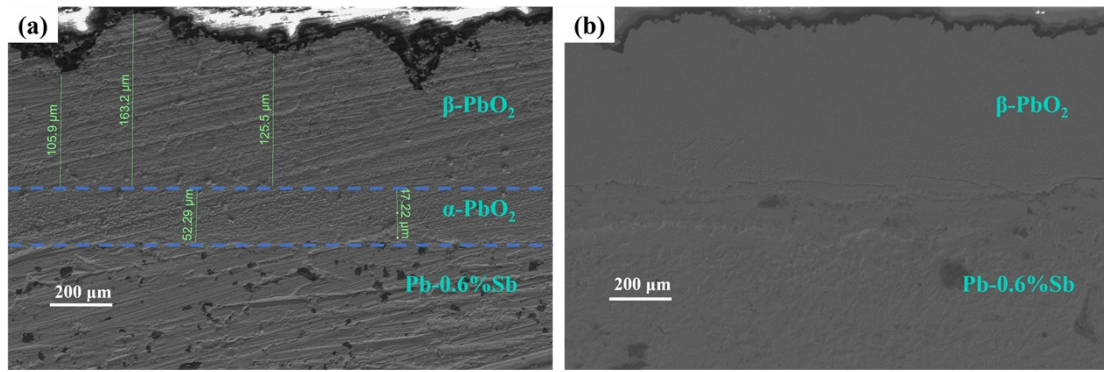

**Fig. S3** Cross-section SEM images of (a)  $\text{Pb-0.6\%Sb}/\alpha\text{-PbO}_2/\beta\text{-PbO}_2$  and (b)  $\text{Pb-0.6\%Sb}/\beta\text{-PbO}_2$ .

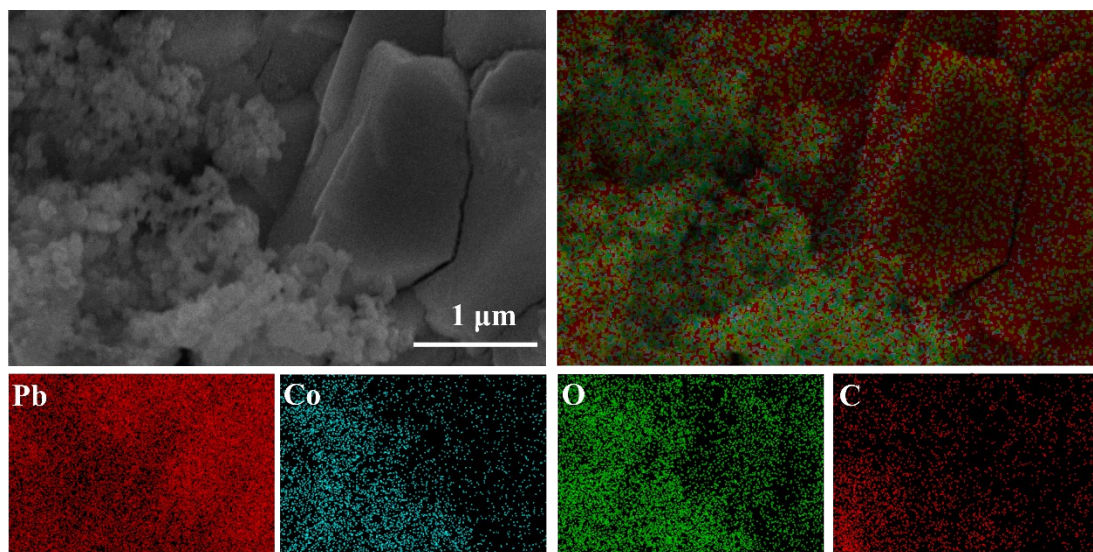

**Fig. S4** The SEM image and element mapping of  $\text{PbO}_2\text{-Co}_3\text{O}_4@\text{C}$  deposit.

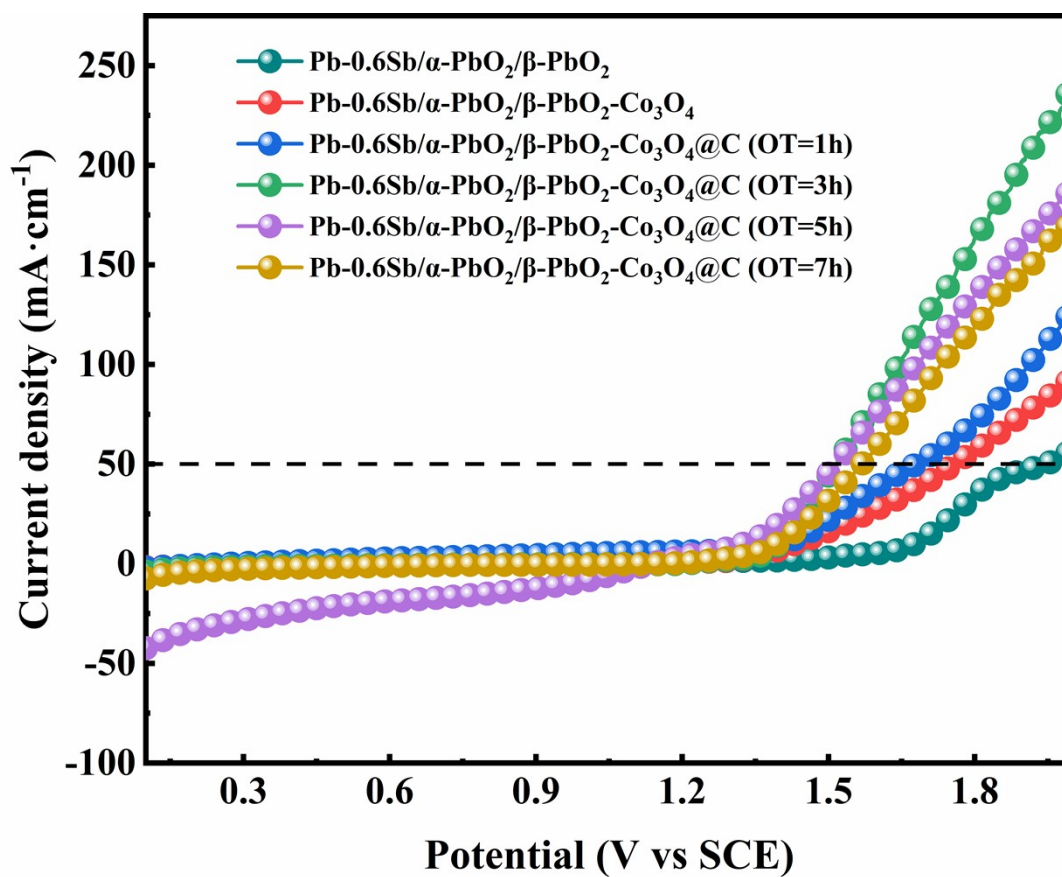

**Fig. S5** The LSV curves of PbO<sub>2</sub> coated electrodes without and with reinforcement of different Co<sub>3</sub>O<sub>4</sub>@C composite.

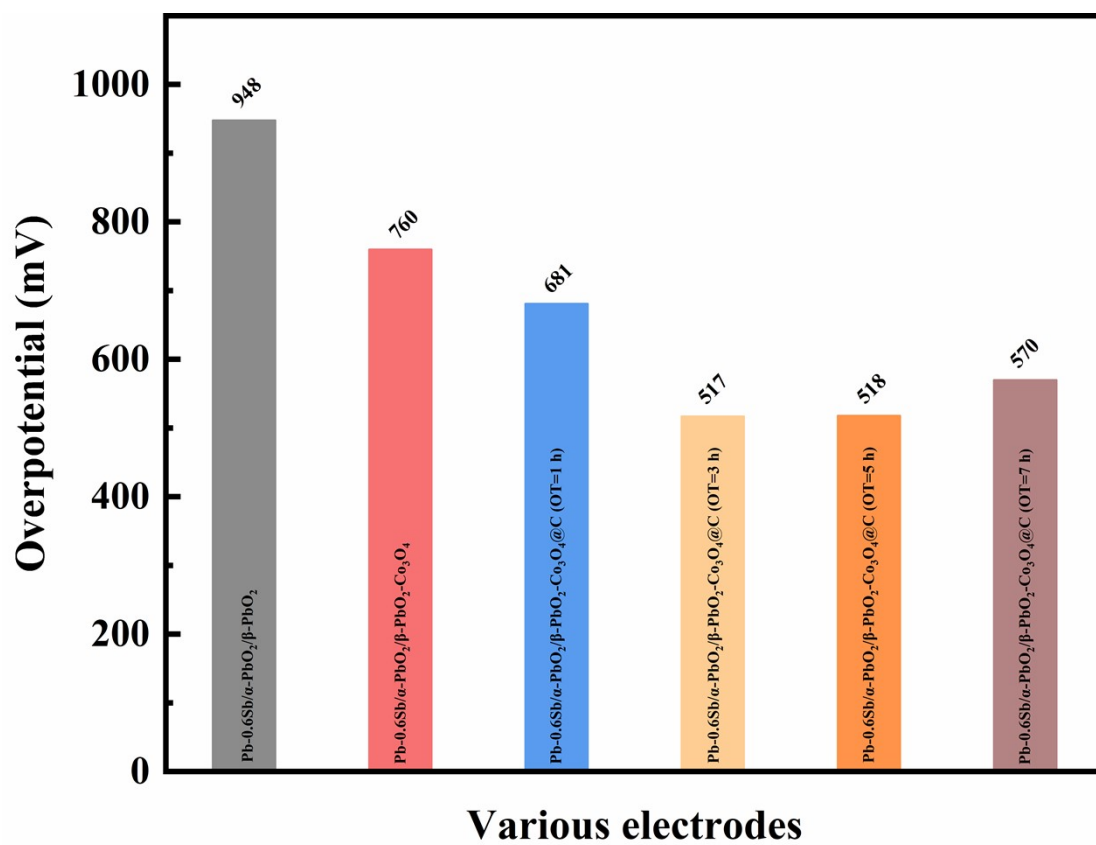

Fig. S6 The OER overpotential of different electrodes.

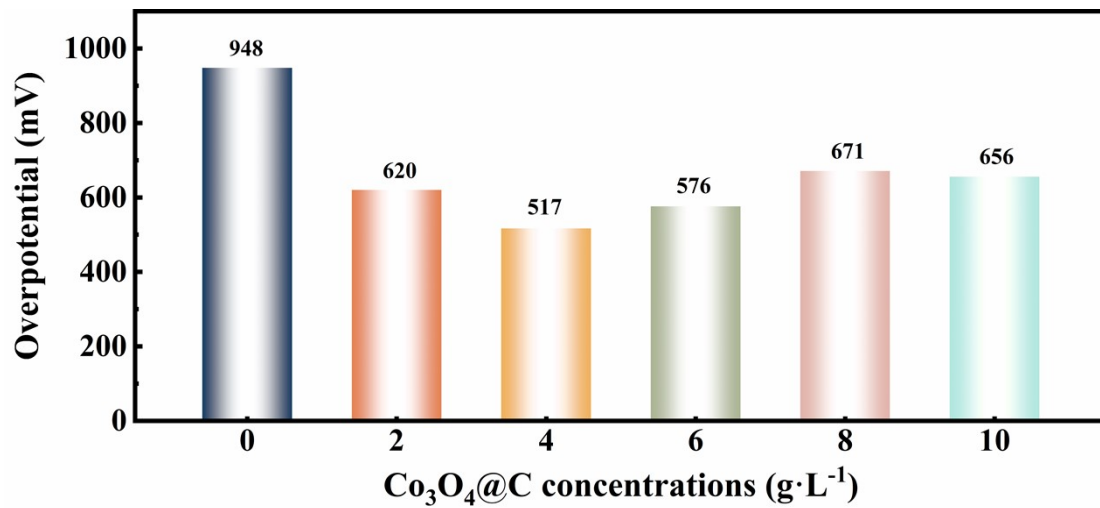

**Fig. S7** The relationship between  $\text{Co}_3\text{O}_4@\text{C}$  concentration and overpotential at 500  $\text{A}\cdot\text{m}^{-2}$ .



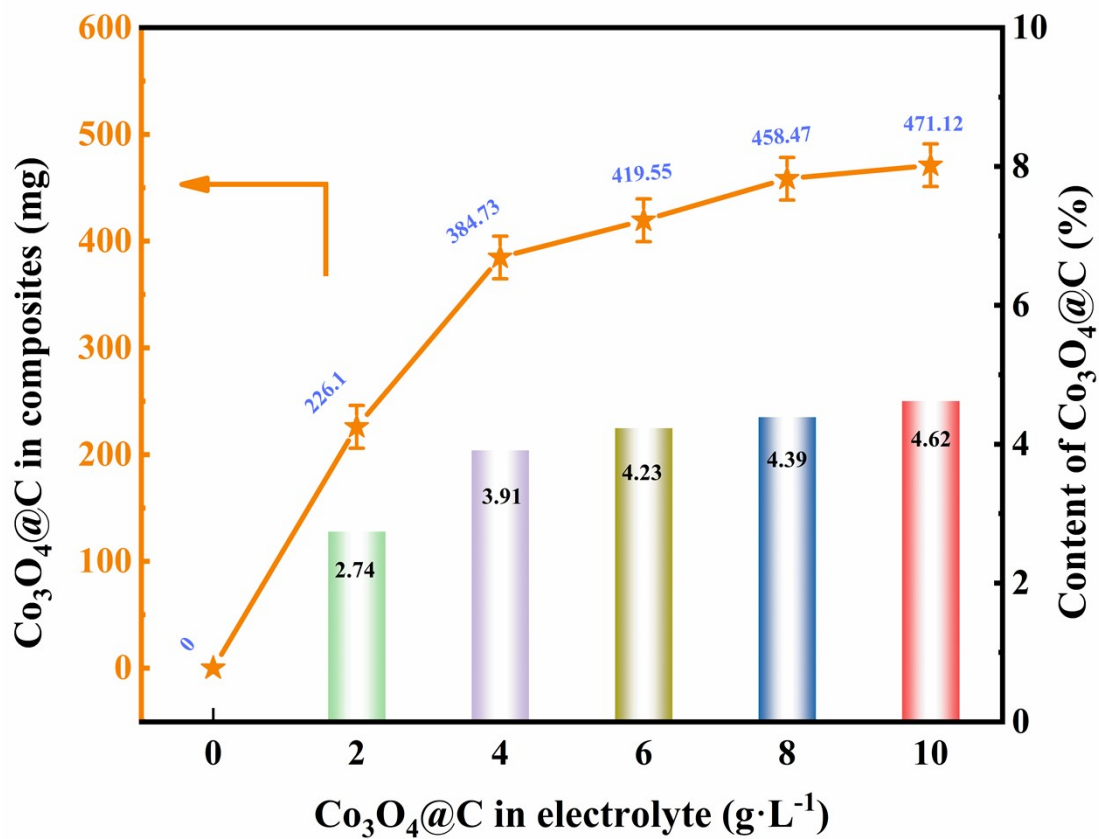

Fig. S8 The graph between Co<sub>3</sub>O<sub>4</sub>@C in electrolyte and in coated electrode.

**Table. S1** Parameters involved in the Tafel fitting of the prepared coated electrodes.

| Concentration (g L <sup>-1</sup> ) | a     | b     | R <sup>2</sup> |
|------------------------------------|-------|-------|----------------|
| 0                                  | 1.197 | 0.487 | 0.997          |
| 2                                  | 0.806 | 0.183 | 0.996          |
| 4                                  | 0.714 | 0.156 | 0.998          |
| 6                                  | 0.789 | 0.167 | 0.996          |
| 8                                  | 0.928 | 0.209 | 0.997          |
| 10                                 | 0.923 | 0.196 | 0.997          |

**Table. S2** Related circuit parameters for PbO<sub>2</sub> electrodes with various Co<sub>3</sub>O<sub>4</sub>@C concentrations according to the EIS shown in Fig. 6(d).

| concentrations | $R_s$    | $R_f$    | $n_1$ | CPE1                     | $R_{ct}$ | $n_2$ | CPE2                     |
|----------------|----------|----------|-------|--------------------------|----------|-------|--------------------------|
|                | $\Omega$ | $\Omega$ |       | Yo [S-sec <sup>n</sup> ] | $\Omega$ |       | Yo [S-sec <sup>n</sup> ] |
| 0              | 1.03     | 0.65     | 0.896 | 0.016                    | 19.45    | 0.887 | 2.229×10 <sup>-5</sup>   |
| 2              | 0.87     | 0.70     | 0.875 | 0.021                    | 3.17     | 0.889 | 6.366×10 <sup>-5</sup>   |
| 4              | 0.84     | 0.12     | 0.871 | 0.025                    | 2.18     | 0.892 | 6.203×10 <sup>-5</sup>   |
| 6              | 0.85     | 0.68     | 0.850 | 0.022                    | 2.82     | 0.872 | 7.847×10 <sup>-5</sup>   |
| 8              | 0.92     | 0.63     | 0.876 | 0.019                    | 9.27     | 0.879 | 5.786×10 <sup>-5</sup>   |
| 10             | 0.90     | 0.71     | 0.862 | 0.023                    | 4.19     | 0.894 | 6.213×10 <sup>-5</sup>   |

**Table. S3** Comparison of the overpotential of various electrodes at  $500 \text{ A}\cdot\text{m}^{-2}$ 

| Electrodes                                                                                          | Concentration<br>of $\text{H}_2\text{SO}_4$ | $\eta$ (mV) | Reference |
|-----------------------------------------------------------------------------------------------------|---------------------------------------------|-------------|-----------|
| Bi-PbO <sub>2</sub>                                                                                 | 0.5M                                        | 1046        | [1]       |
| Pb-0.76%Ag                                                                                          | 1.53M                                       | 1038        | -         |
| Al/Pb-PANI-WC                                                                                       | 1.53M                                       | 941         | [2]       |
| Pure Pb                                                                                             | 1.8M                                        | 936         | [3]       |
| CF/PbO <sub>2</sub>                                                                                 | 1.53M                                       | 931         | [4]       |
| PANI/CeO <sub>2</sub> /WC                                                                           | 1.53M                                       | 856         | [5]       |
| PbO <sub>2</sub> -CeO <sub>2</sub>                                                                  | 1.63M                                       | 826         | [6]       |
| Ti/Cu-PbO <sub>2</sub>                                                                              | 0.5M                                        | 751         | [7]       |
| Pb-0.3Ag/PbO <sub>2</sub> -Co <sub>3</sub> O <sub>4</sub>                                           | 1.53M                                       | 747         | [8]       |
| Ti/TiO <sub>2</sub> -NTs/PbO <sub>2</sub>                                                           | 1.53M                                       | 630         | [9]       |
| Pb-0.6Sb/ $\alpha$ -PbO <sub>2</sub> / $\beta$ -PbO <sub>2</sub> -Co <sub>3</sub> O <sub>4</sub> @C | 1.53M                                       | 517         | This work |

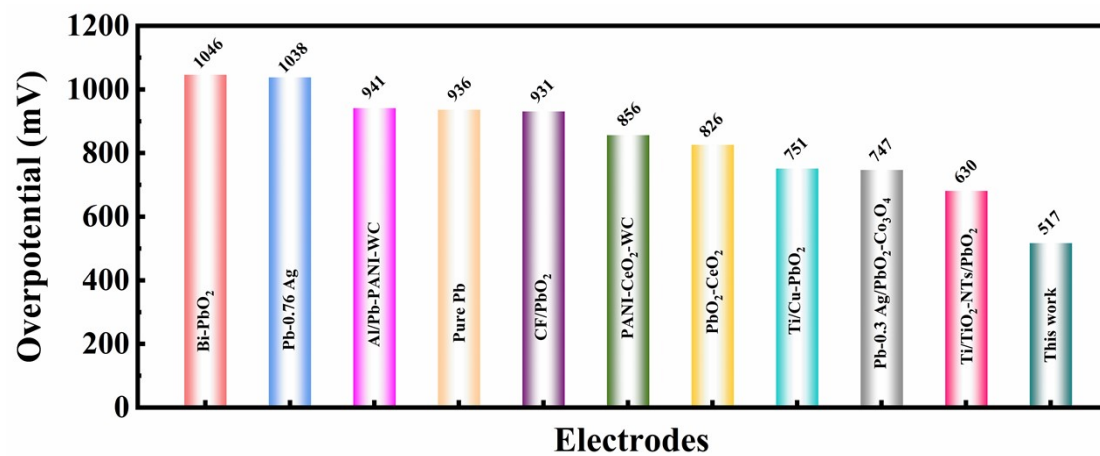

Fig. S9 The comparison chart of the overpotential of various works at 500 A m<sup>-2</sup>.

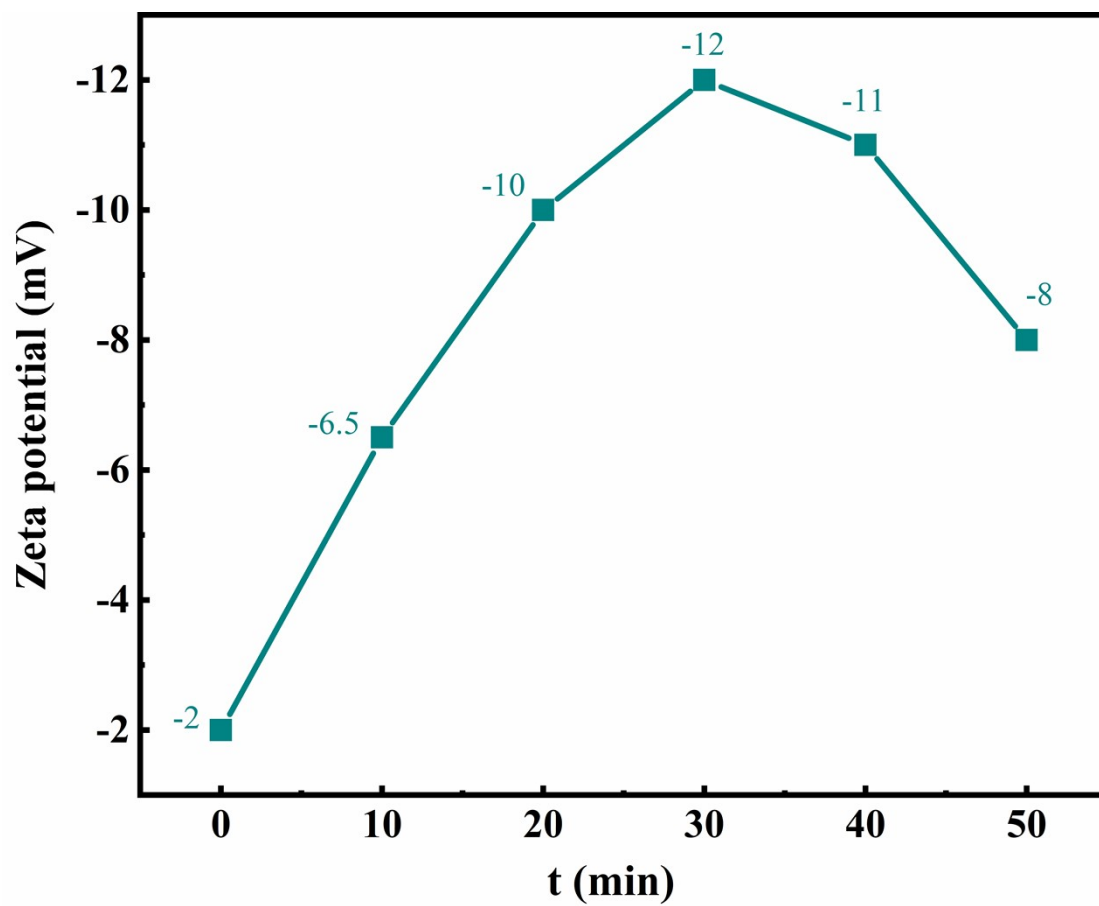

**Fig. S10** The zeta potential of  $\text{Co}_3\text{O}_4@\text{C}$  particles in  $\beta\text{-PbO}_2$  plating bath at different ultrasonic dispersion time.

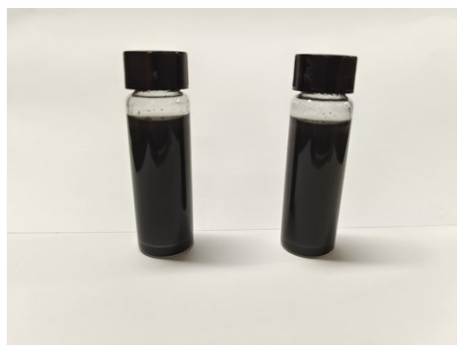

**(a) 0 min**

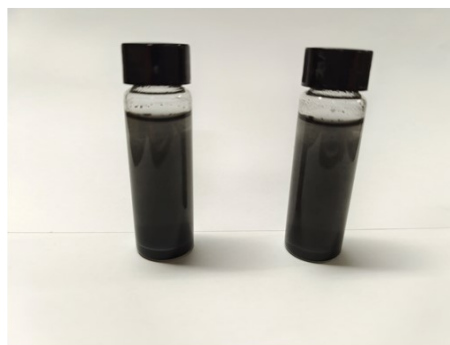

**(b) 30 min**

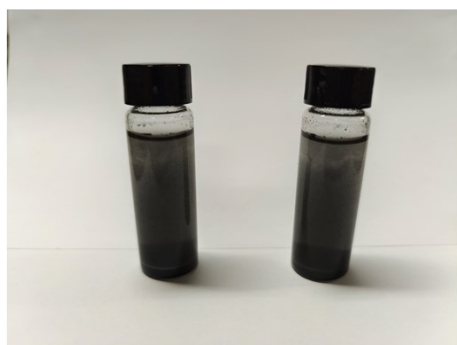

**(c) 60 min**

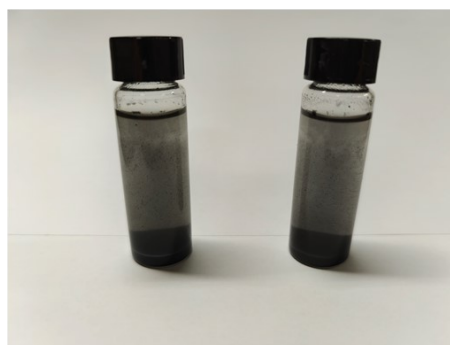

**(d) 90 min**

**Fig. S11** Photographs of sedimentation of  $\text{Co}_3\text{O}_4@C$  particles in  $\beta\text{-PbO}_2$  plating bath.

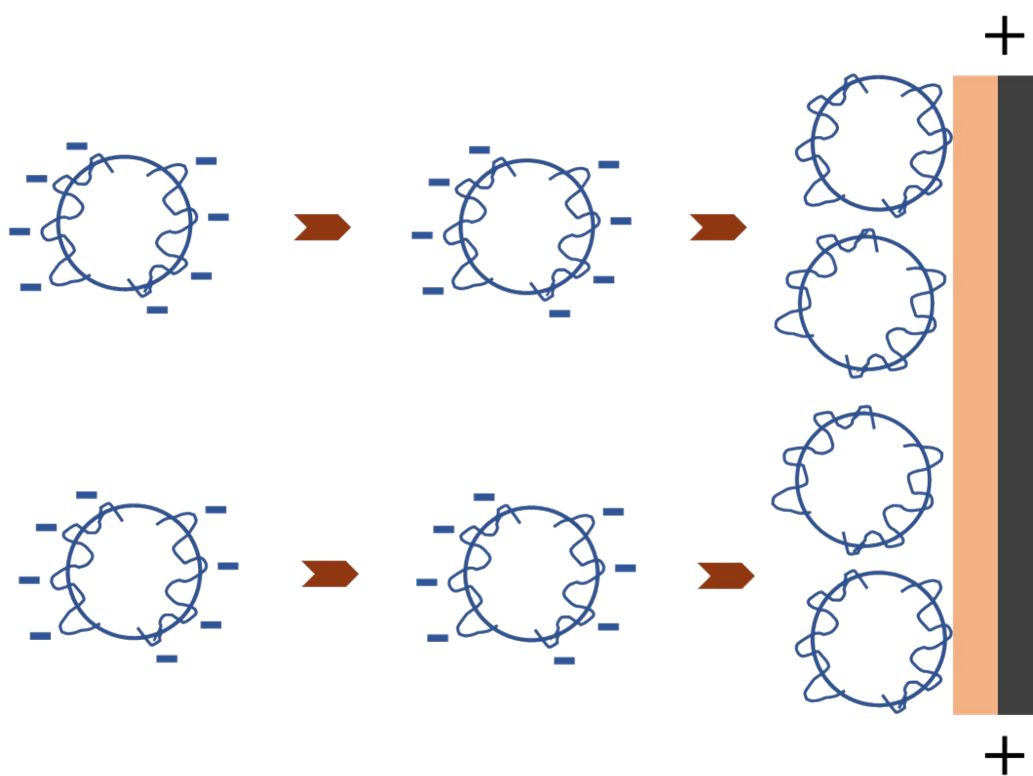

**Fig. S12** Diagram of the migration of  $\text{Co}_3\text{O}_4@\text{C}$  particles on the electrode surface.



## References

1. W. Yang, W. Yang and X. Lin, *Applied Surface Science*, 2012, **258**, 5716-5722.
2. R. D. Xu, L. P. Huang, J. F. Zhou, P. Zhan, Y. Y. Guan and Y. Kong, *Hydrometallurgy*, 2012, **125-126**, 8-15.
3. I. Ivanov, Y. Stefanov, Z. Noncheva, M. Petrova, T. Dobrev, L. Mirkova, R. Vermeersch and J. P. Demaerel, *Hydrometallurgy*, 2000, **57**, 125-139.
4. J. Liu, J. Xu and Z. Han, *ECS Journal of Solid State Science and Technology*, 2020, **9**, 041012.
5. L. Jin, H. Huang, Y. Fei, H.-t. Yang, H.-y. Zhang and Z.-c. Guo, *Hydrometallurgy*, 2018, **176**, 201-207.
6. W. Wang, Z. Wang, T. Yuan, R. Li, H. Li, W. Lin and D. Zheng, *Hydrometallurgy*, 2019, **183**, 221-229.
7. X. Hao, S. Dan, Z. Qian, Y. Honghui and W. Yan, *RSC Advances*, 2014, **4**, 25011-25017.
8. S. He, R. Xu, L. Sun, Y. Fan, Z. Zhao, H. Liu and H. Lv, *Hydrometallurgy*, 2020, **194**, 105357.
9. C. Chen, X. Wang, R. Xu, Y. Zhang, S. Feng, A. Ju and W. Jiang, *RSC Advances*, 2021, **11**, 6146-6158.
